# Supplementary material for: Enhancing Whole-Brain Magnetic Field Homogeneity for 3D-Magnetic Resonance Spectroscopic Imaging with a Novel Unified Coil: A Preliminary Study
Source: MDPI journal article supplement (doi:10.3390/cancers16061233), 2024-03-21
Supplement: s1 [file s1]

## Supplementary material

**Supplementary Table S1: X, Y, and Z-coordinates of 51 channel UNIC head coil loop position across the brain surface**

| <b>Coil number</b> | <b>X (m)</b> | <b>Y (m)</b> | <b>Z (m)</b> |
|--------------------|--------------|--------------|--------------|
| <b>Coil 1</b>      | 0.04         | 0            | 0.1          |
| <b>Coil 2</b>      | -0.04        | 0            | 0.1          |
| <b>Coil 3</b>      | -0.098       | -0.005       | 0.05         |
| <b>Coil 4</b>      | -0.068       | 0.051        | 0.07         |
| <b>Coil 5</b>      | 0.068        | 0.051        | 0.07         |
| <b>Coil 6</b>      | 0.098        | -0.005       | 0.05         |
| <b>Coil 7</b>      | -0.089       | 0.063        | 0.016        |
| <b>Coil 8</b>      | -0.034       | 0.098        | 0.036        |
| <b>Coil 9</b>      | 0.034        | 0.098        | 0.036        |
| <b>Coil 10</b>     | 0.089        | 0.063        | 0.016        |
| <b>Coil 11</b>     | 0            | -0.07        | -0.11        |
| <b>Coil 12</b>     | 0            | -0.021       | -0.118       |
| <b>Coil 13</b>     | 0            | 0.044        | -0.112       |
| <b>Coil 14</b>     | 0            | 0.096        | -0.072       |
| <b>Coil 15</b>     | 0            | 0.12         | -0.01        |
| <b>Coil 16</b>     | -0.062       | 0.098        | -0.03        |
| <b>Coil 17</b>     | -0.057       | 0.06         | -0.087       |
| <b>Coil 18</b>     | -0.061       | 0.01         | -0.103       |
| <b>Coil 19</b>     | -0.056       | -0.05        | -0.106       |
| <b>Coil 20</b>     | 0.062        | 0.098        | -0.03        |
| <b>Coil 21</b>     | 0.057        | 0.06         | -0.087       |
| <b>Coil 22</b>     | 0.061        | 0.01         | -0.103       |
| <b>Coil 23</b>     | 0.056        | -0.05        | -0.106       |
| <b>Coil 24</b>     | -0.089       | -0.024       | -0.071       |
| <b>Coil 25</b>     | -0.08        | 0.045        | -0.049       |
| <b>Coil 26</b>     | 0.089        | -0.024       | -0.071       |
| <b>Coil 27</b>     | 0.08         | 0.045        | -0.049       |
| <b>Coil 28</b>     | 0.02         | 0.047        | 0.109        |
| <b>Coil 29</b>     | -0.02        | 0.047        | 0.109        |
| <b>Coil 30</b>     | 0.02         | 0.075        | 0.092        |
| <b>Coil 31</b>     | -0.02        | 0.075        | 0.092        |
| <b>Coil 32</b>     | 0.02         | 0.097        | 0.068        |
| <b>Coil 33</b>     | -0.02        | 0.097        | 0.068        |

|                |        |       |        |
|----------------|--------|-------|--------|
| <b>Coil 34</b> | 0.02   | 0.112 | 0.039  |
| <b>Coil 35</b> | -0.02  | 0.112 | 0.039  |
| <b>Coil 36</b> | -0.109 | -0.04 | 0.015  |
| <b>Coil 37</b> | -0.109 | -0.01 | 0.015  |
| <b>Coil 38</b> | -0.109 | 0.02  | 0.015  |
| <b>Coil 39</b> | -0.102 | 0.048 | 0.014  |
| <b>Coil 40</b> | -0.109 | -0.04 | -0.015 |
| <b>Coil 41</b> | -0.109 | -0.01 | -0.015 |
| <b>Coil 42</b> | -0.109 | 0.02  | -0.015 |
| <b>Coil 43</b> | -0.102 | 0.048 | -0.014 |
| <b>Coil 44</b> | 0.109  | -0.04 | 0.015  |
| <b>Coil 45</b> | 0.109  | -0.01 | 0.015  |
| <b>Coil 46</b> | 0.109  | 0.02  | 0.015  |
| <b>Coil 47</b> | 0.102  | 0.048 | 0.014  |
| <b>Coil 48</b> | 0.109  | -0.04 | -0.015 |
| <b>Coil 49</b> | 0.109  | -0.01 | -0.015 |
| <b>Coil 50</b> | 0.109  | 0.02  | -0.015 |
| <b>Coil 51</b> | 0.102  | 0.048 | -0.014 |

**Supplementary Table S2: Absolute mean and maximum current used in UNIC 51 channel head coils across twenty-four subjects.**

| <b>Absolute mean (Amperes)</b> | <b>Max (Amperes)</b> |
|--------------------------------|----------------------|
| 0.41                           | 2.31                 |

**Supplementary Table S3: Coil currents in each 51 channel UNIC head coils in three representative subjects**

| <b>Coil current</b> | <b>Subject 1</b> | <b>Subject 2</b> | <b>Subject 3</b> |
|---------------------|------------------|------------------|------------------|
| <b>Coil 1</b>       | -0.7394          | -0.5662          | -1.0458          |
| <b>Coil 2</b>       | -0.7494          | -0.607           | -0.8513          |
| <b>Coil 3</b>       | 0.34509          | -0.147           | 0.71077          |
| <b>Coil 4</b>       | -0.2209          | -0.3687          | 0.0002           |
| <b>Coil 5</b>       | -0.2502          | -0.2137          | -0.07            |
| <b>Coil 6</b>       | 0.2104           | 0.14722          | 0.83482          |
| <b>Coil 7</b>       | 0.59142          | 0.4133           | 0.57737          |
| <b>Coil 8</b>       | 0.06936          | -0.0552          | -0.0059          |
| <b>Coil 9</b>       | 0.05847          | -0.0472          | 0.03864          |
| <b>Coil 10</b>      | 0.56465          | 0.40626          | 0.67413          |
| <b>Coil 11</b>      | 0.01738          | 0.18101          | 0.02572          |

|                |         |         |         |
|----------------|---------|---------|---------|
| <b>Coil 12</b> | 0.02616 | 0.14609 | -0.0115 |
| <b>Coil 13</b> | -0.0393 | 0.07656 | -0.0347 |
| <b>Coil 14</b> | 0.05044 | 0.10302 | 0.04424 |
| <b>Coil 15</b> | 0.08522 | 0.04603 | 0.08379 |
| <b>Coil 16</b> | 0.15555 | 0.13871 | 0.07474 |
| <b>Coil 17</b> | 0.00329 | 0.04299 | -0.0594 |
| <b>Coil 18</b> | -0.0334 | 0.05341 | -0.0955 |
| <b>Coil 19</b> | -0.037  | 0.00416 | 0.03387 |
| <b>Coil 20</b> | 0.14319 | 0.10475 | 0.05357 |
| <b>Coil 21</b> | 0.02507 | 0.06174 | 0.00392 |
| <b>Coil 22</b> | -0.0171 | 0.08419 | -0.0087 |
| <b>Coil 23</b> | -0.0296 | 0.04916 | 0.09768 |
| <b>Coil 24</b> | -0.0335 | 0.02244 | -0.1069 |
| <b>Coil 25</b> | 0.00067 | 0.01359 | 0.00507 |
| <b>Coil 26</b> | -0.0192 | -0.0265 | -0.0432 |
| <b>Coil 27</b> | 0.00044 | 0.00829 | 0.00283 |
| <b>Coil 28</b> | -0.1803 | -0.2495 | -0.4591 |
| <b>Coil 29</b> | -0.3829 | -0.177  | -0.5517 |
| <b>Coil 30</b> | -0.2902 | -0.1341 | -0.3369 |
| <b>Coil 31</b> | -0.1865 | -0.1635 | -0.2894 |
| <b>Coil 32</b> | -0.0093 | -0.0588 | -0.103  |
| <b>Coil 33</b> | -0.1005 | -0.0526 | -0.1423 |
| <b>Coil 34</b> | -0.0947 | -0.0111 | -0.0565 |
| <b>Coil 35</b> | -0.0707 | -0.029  | 0.0117  |
| <b>Coil 36</b> | 0.21596 | -0.9395 | -0.447  |
| <b>Coil 37</b> | 1.21245 | 1.32372 | 0.94338 |
| <b>Coil 38</b> | 0.67865 | 0.66394 | 0.26424 |
| <b>Coil 39</b> | 0.62409 | 0.31509 | 0.32838 |
| <b>Coil 40</b> | 1.20568 | 2.1337  | 1.68959 |
| <b>Coil 41</b> | -0.1351 | -0.2604 | -0.2207 |
| <b>Coil 42</b> | 0.1308  | 0.21302 | 0.50056 |
| <b>Coil 43</b> | -0.0387 | 0.14187 | -0.0199 |
| <b>Coil 44</b> | 0.45667 | -1.4838 | -0.4372 |
| <b>Coil 45</b> | 1.09762 | 1.05078 | 1.21283 |
| <b>Coil 46</b> | 0.89135 | 0.60793 | 0.43705 |
| <b>Coil 47</b> | 0.65593 | 0.18239 | 0.39752 |
| <b>Coil 48</b> | 1.13982 | 2.68984 | 1.77637 |
| <b>Coil 49</b> | -0.1187 | -0.4153 | -0.6145 |
| <b>Coil 50</b> | 0.06073 | 0.3007  | 0.45866 |
| <b>Coil 51</b> | -0.0333 | 0.09149 | -0.2373 |

**Supplementary Table S4: P-values for figure 2 showing the comparison of standard deviation of the frequency for 24 subjects in global shimming of the whole brain.**

| <b>B0 field shimming</b> | <b>2nd order SH</b> | <b>iPRES 32-ch</b> | <b>3rd order SH</b> | <b>4th order SH</b> | <b>5th order SH</b> |
|--------------------------|---------------------|--------------------|---------------------|---------------------|---------------------|
| <b>iPRES 32-ch</b>       | p<0.001             | -                  | -                   | -                   | -                   |
| <b>3rd order SH</b>      | p<0.001             | P=0.02             | -                   | -                   | -                   |
| <b>4th order SH</b>      | p<0.001             | p<0.001            | p<0.001             | -                   | -                   |
| <b>5th order SH</b>      | p<0.001             | p<0.001            | p<0.001             | p<0.001             | -                   |
| <b>UNIC 51-ch</b>        | p<0.001             | p<0.001            | p<0.001             | p<0.001             | 1                   |

**Supplementary Table S5: P-values for figure 3 showing the comparison of brain coverage for MRSI at spatial resolutions (a) 1.44 cc and (b) 0.09 cc.**

| <b>B0 field shimming</b> | <b>2nd order SH</b> | <b>iPRES 32-ch</b> | <b>3rd order SH</b> | <b>4th order SH</b> | <b>5th order SH</b> |
|--------------------------|---------------------|--------------------|---------------------|---------------------|---------------------|
| <b>(a) 1.44 cc</b>       |                     |                    |                     |                     |                     |
| <b>iPRES 32-ch</b>       | p<0.001             | -                  | -                   | -                   | -                   |
| <b>3rd order SH</b>      | p<0.001             | p<0.001            | -                   | -                   | -                   |
| <b>4th order SH</b>      | p<0.001             | p<0.001            | p<0.001             | -                   | -                   |
| <b>5th order SH</b>      | p<0.001             | p<0.001            | p<0.001             | p<0.001             | -                   |
| <b>UNIC 51-ch</b>        | p<0.001             | p<0.001            | p<0.001             | 0.448               | 0.679               |
| <b>(b) 0.09 cc</b>       |                     |                    |                     |                     |                     |
| <b>iPRES 32-ch</b>       | p<0.001             | -                  | -                   | -                   | -                   |
| <b>3rd order SH</b>      | p<0.001             | p<0.001            | -                   | -                   | -                   |
| <b>4th order SH</b>      | p<0.001             | p<0.001            | p<0.001             | -                   | -                   |
| <b>5th order SH</b>      | p<0.001             | p<0.001            | p<0.001             | p<0.001             | -                   |
| <b>UNIC 51-ch</b>        | p<0.001             | p<0.001            | p<0.001             | 0.004               | 0.02                |

**Supplementary Table S6: P-values for figure 4 (a,d) showing the comparison of brain coverage in prefrontal cortex (PFC) for MRSI at spatial resolutions (a) 1.44 cc and (b) 0.09 cc.**

| <b>B0 field shimming</b> | <b>2nd order SH</b> | <b>iPRES 32-ch</b> | <b>3rd order SH</b> | <b>4th order SH</b> | <b>5th order SH</b> |
|--------------------------|---------------------|--------------------|---------------------|---------------------|---------------------|
| <b>(a) 1.44 cc</b>       |                     |                    |                     |                     |                     |
| <b>iPRES 32-ch</b>       | p<0.001             | -                  | -                   | -                   | -                   |
| <b>3rd order SH</b>      | p<0.001             | p<0.001            | -                   | -                   | -                   |
| <b>4th order SH</b>      | p<0.001             | p<0.001            | p<0.001             | -                   | -                   |
| <b>5th order SH</b>      | p<0.001             | p<0.001            | p<0.001             | 0.111               | -                   |
| <b>UNIC 51-ch</b>        | p<0.001             | p<0.001            | 0.036               | 1                   | p<0.001             |
| <b>(b) 0.09cc</b>        |                     |                    |                     |                     |                     |
| <b>iPRES 32-ch</b>       | p<0.001             | -                  | -                   | -                   | -                   |
| <b>3rd order SH</b>      | p<0.001             | p<0.001            | -                   | -                   | -                   |
| <b>4th order SH</b>      | p<0.001             | p<0.001            | p<0.001             | -                   | -                   |
| <b>5th order SH</b>      | p<0.001             | p<0.001            | p<0.001             | 0.039               | -                   |
| <b>UNIC 51-ch</b>        | p<0.001             | p<0.001            | p<0.001             | 1                   | 0.199               |

**Supplementary Table S7: P-values for figure 4 (b,e) showing the comparison of brain coverage in medial temporal lobe (MTL) + temporal pole for MRSI at spatial resolutions (a) 1.44 cc and (b) 0.09 cc.**

| <b>B0 field<br/>shimming</b> | <b>2nd<br/>order<br/>SH</b> | <b>iPRES<br/>32-ch</b> | <b>3rd<br/>order<br/>SH</b> | <b>4th<br/>order<br/>SH</b> | <b>5th<br/>order<br/>SH</b> |
|------------------------------|-----------------------------|------------------------|-----------------------------|-----------------------------|-----------------------------|
| <b>(a) 1.44 cc</b>           |                             |                        |                             |                             |                             |
| <b>iPRES 32-<br/>ch</b>      | 0.001                       | -                      | -                           | -                           | -                           |
| <b>3rd order<br/>SH</b>      | 0.593                       | 1                      | -                           | -                           | -                           |
| <b>4th order<br/>SH</b>      | p<0.001                     | 0.002                  | p<0.001                     | -                           | -                           |
| <b>5th order<br/>SH</b>      | p<0.001                     | p<0.001                | p<0.001                     | p<0.001                     | -                           |
| <b>UNIC 51-<br/>ch</b>       | p<0.001                     | p<0.001                | p<0.001                     | p<0.001                     | 0.035                       |
| <b>(b) 0.09cc</b>            |                             |                        |                             |                             |                             |
| <b>iPRES 32-<br/>ch</b>      | p<0.001                     | -                      | -                           | -                           | -                           |
| <b>3rd order<br/>SH</b>      | p<0.001                     | 1                      | -                           | -                           | -                           |
| <b>4th order<br/>SH</b>      | p<0.001                     | p<0.001                | p<0.001                     | -                           | -                           |
| <b>5th order<br/>SH</b>      | p<0.001                     | p<0.001                | p<0.001                     | p<0.001                     | -                           |
| <b>UNIC 51-<br/>ch</b>       | p<0.001                     | p<0.001                | p<0.001                     | p<0.001                     | 1                           |
